# Supplementary material for: A novel aggregation-induced emission poly(phosphoramidate): fluorescence properties and visual detection for Cu2+
Source: Royal Society of Chemistry journal article supplement (doi:10.1039/d1ma00830g), 2021-01-01
Supplement: d1ma00830g1.pdf [file d1ma00830g1.pdf]

## Supporting Information for

### A novel aggregation-induced emission poly(phosphoramidate): fluorescence properties and visual detection for Cu<sup>2+</sup>

Liulong Guo, Hongxia Yan,\* Lianlian Wang, Pengfei Yang, Lirong Yan and Yan Zhao\*

Key Laboratory of Polymer Science and Technology of Shaanxi Province, School of Chemistry and Chemical Engineering, Northwestern Polytechnical University, Xi'an 710072, China.

E-mail: [hongxiayan@nwpu.edu.cn](mailto:hongxiayan@nwpu.edu.cn); [zhaoyan@nwpu.edu.cn](mailto:zhaoyan@nwpu.edu.cn).

**Table S1** The specific data during P1–P4 synthesis.

|                                                                   | P1           | P2           | P3           | P4           |
|-------------------------------------------------------------------|--------------|--------------|--------------|--------------|
| Reactant A                                                        | TEP          | TEP          | TEP          | TEP          |
| Reactant B                                                        | DEM          | DEM          | DEM          | DAH          |
| A/B(mol/mol)                                                      | 1:1.6        | 1:1.4        | 1:1.8        | 1:1.6        |
| m <sub>A</sub> /g (n <sub>A</sub> /mol)                           | 27.32 (0.15) | 27.32 (0.15) | 27.32 (0.15) | 27.32 (0.15) |
| m <sub>B</sub> /g (n <sub>B</sub> /mol)                           | 14.42 (0.24) | 12.60 (0.21) | 16.20 (0.27) | 24.89 (0.24) |
| -OCH <sub>2</sub> CH <sub>3</sub> /-<br>NH <sub>2</sub> (mol/mol) | 3:3.2        | 3:2.8        | 3:3.6        | 3:3.2        |

Where m<sub>A</sub>: the mass of reactant A

n<sub>A</sub>: the amount of substance of reactant A

m<sub>B</sub>: the mass of reactant B

n<sub>B</sub>: the amount of substance of reactant B

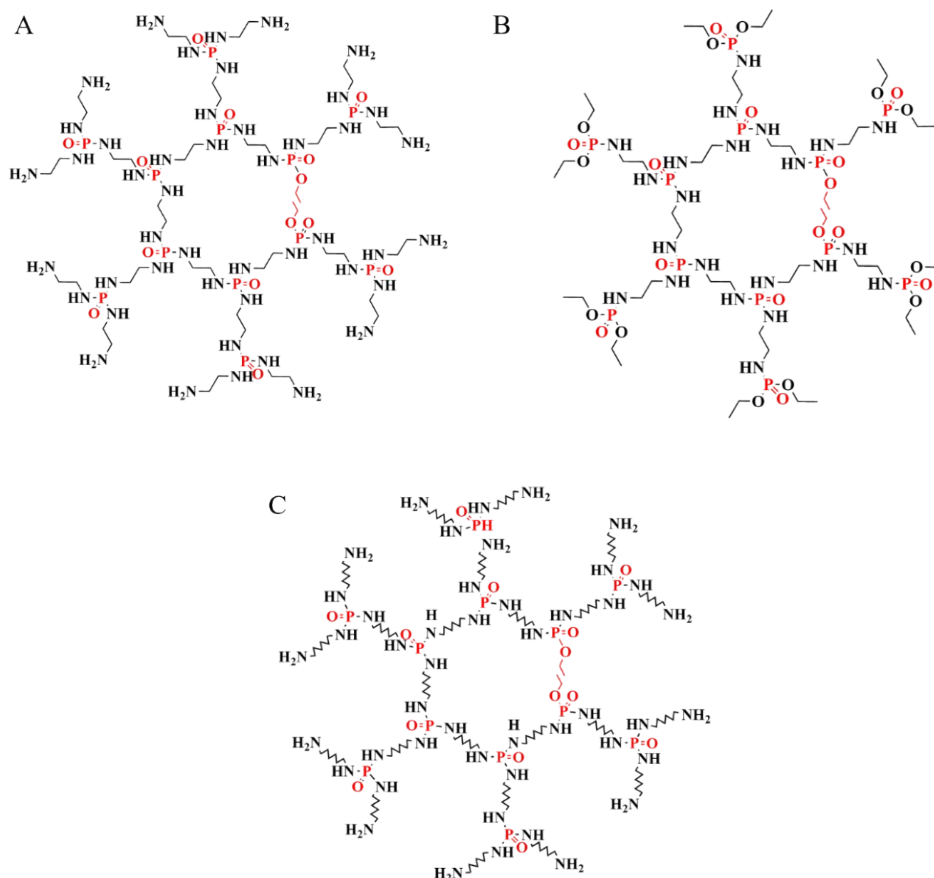

**Fig. S1.** Schematic structure of (A) P1 and P3, (B) P2, (C) P4

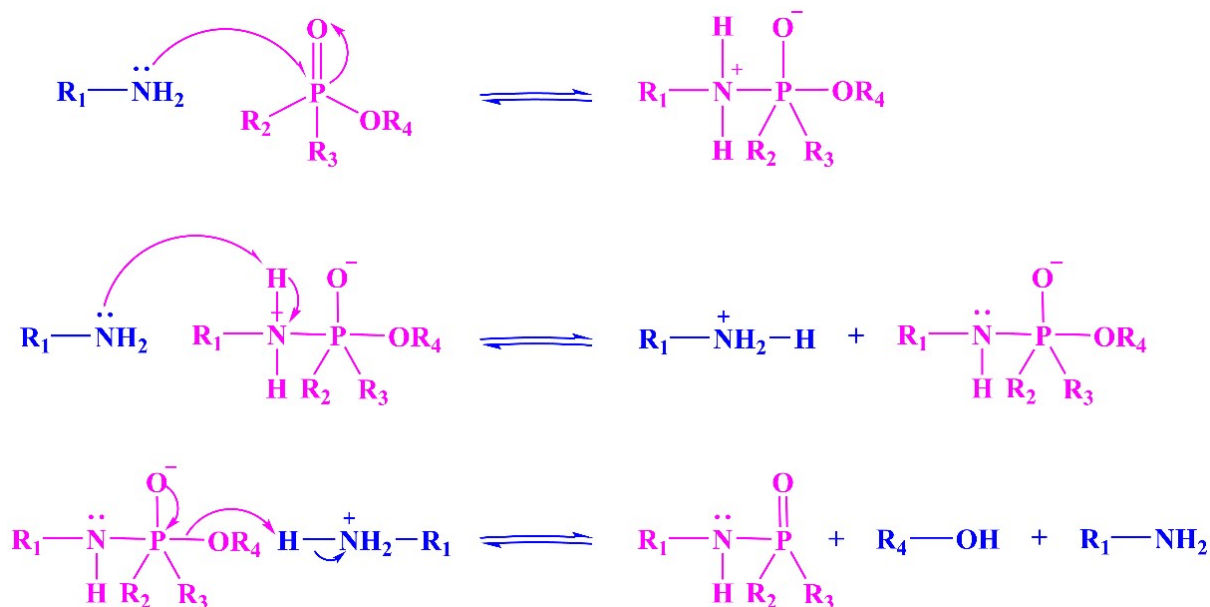

**Scheme S1** The aminolysis reaction mechanism of phosphate and polyamines.

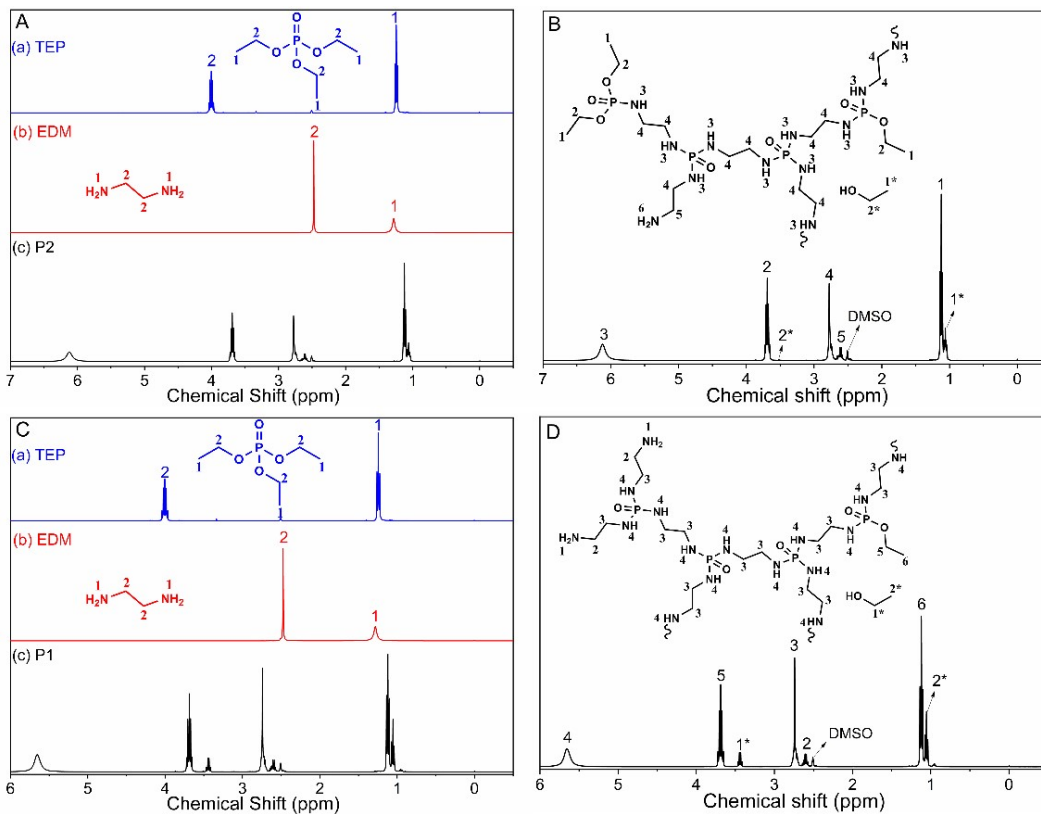

**Fig. S2** The  $^1\text{H}$  NMR spectra of reactants and P2-P3

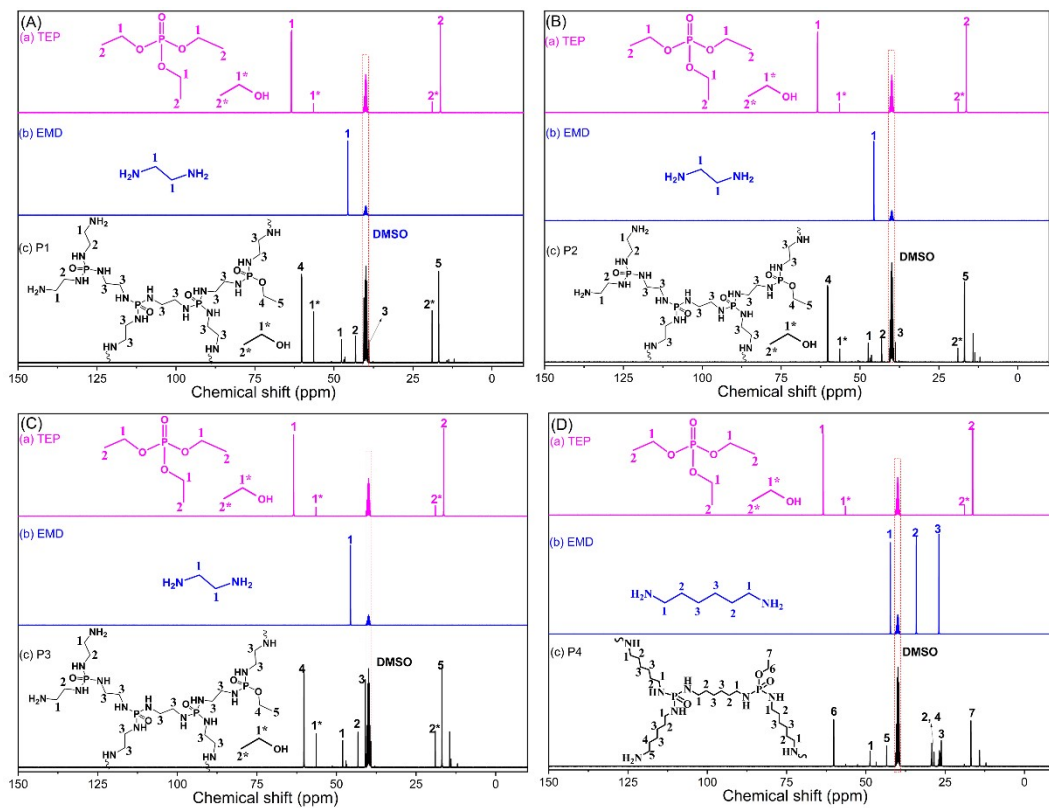

**Fig. S3** The  $^{13}\text{C}$  NMR spectra of reactants and P1-P4

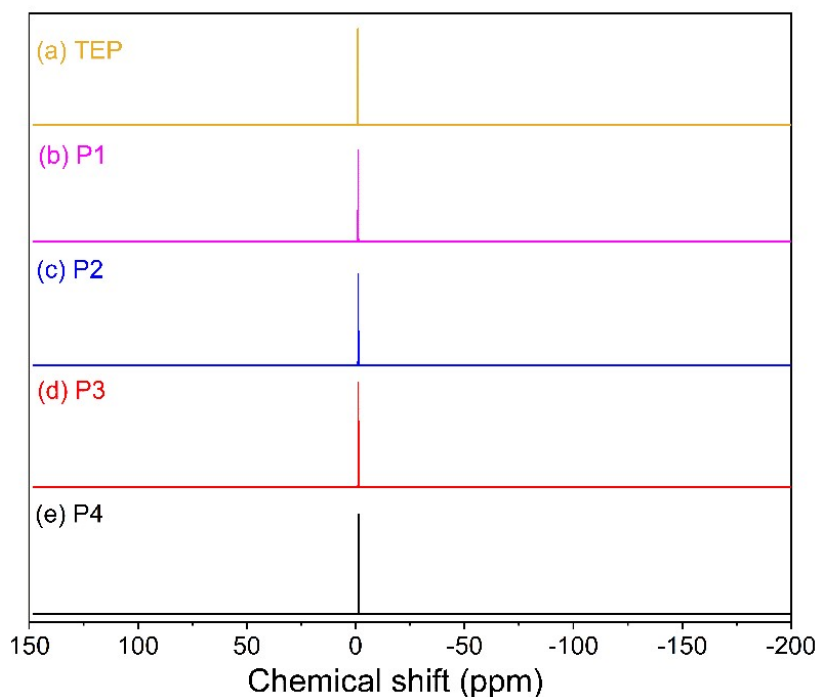

**Fig. S4**  $^{31}\text{P}$  NMR spectra of TEP and P1-P4

**Table S2** The degree of branching (DB) of P1-P4 .

|    | P1   | P2   | P3   | P4   |
|----|------|------|------|------|
| DB | 0.50 | 0.43 | 0.19 | 0.19 |

As for P1, the molar ratio of triethyl phosphate (TEP) and ethanediamine (EDM) is 1:1.6, therefore the TEP can be incorporated as dendritic (D), linear (L) and terminal (T) unit, and we can identify the amount of L units by the proton signal marked with H5 and H6. At the same time, we can confirm the total number of TEP (T+D+L) through the proton signal marked with H4 (according to Fig.2B). The DB was calculated using equation (1), which is feasible for the polymerization of  $\text{A}_2$  and  $\text{B}_3$  monomer.

$$\text{DB} = \frac{T + D}{T + D + L} \quad (1)$$

The calculated DB values of P1-P4 are summarized in Table S2.

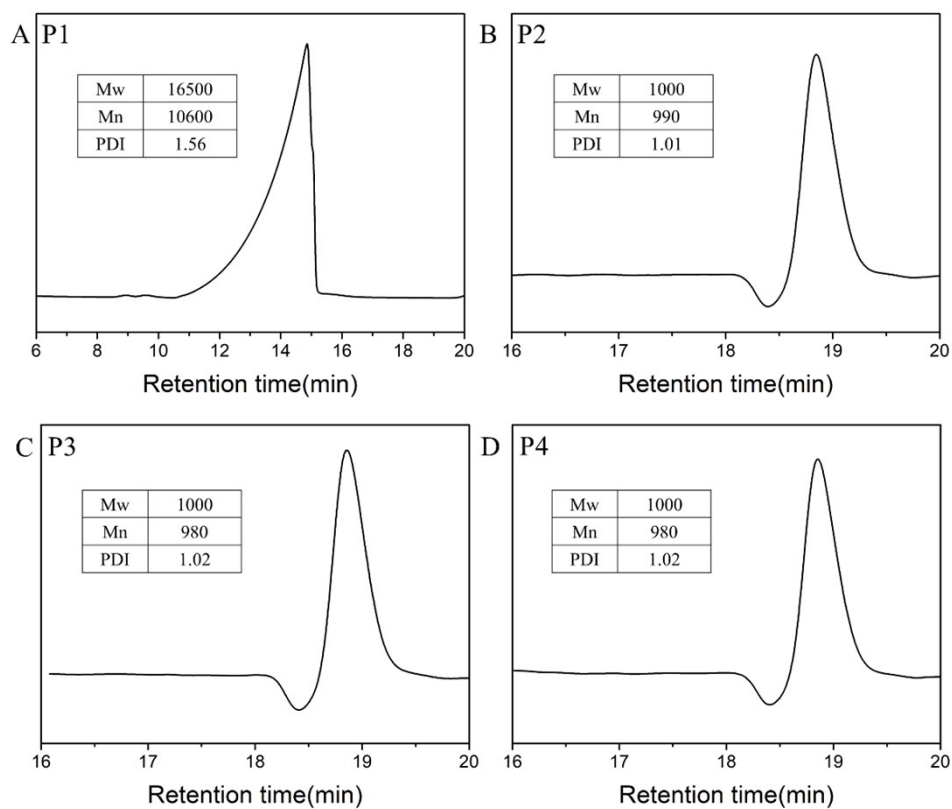

**Fig. S5.** GPC curve of P1-P4 (eluent: 0.1M NaNO<sub>3</sub> aqueous solution, narrow standard)

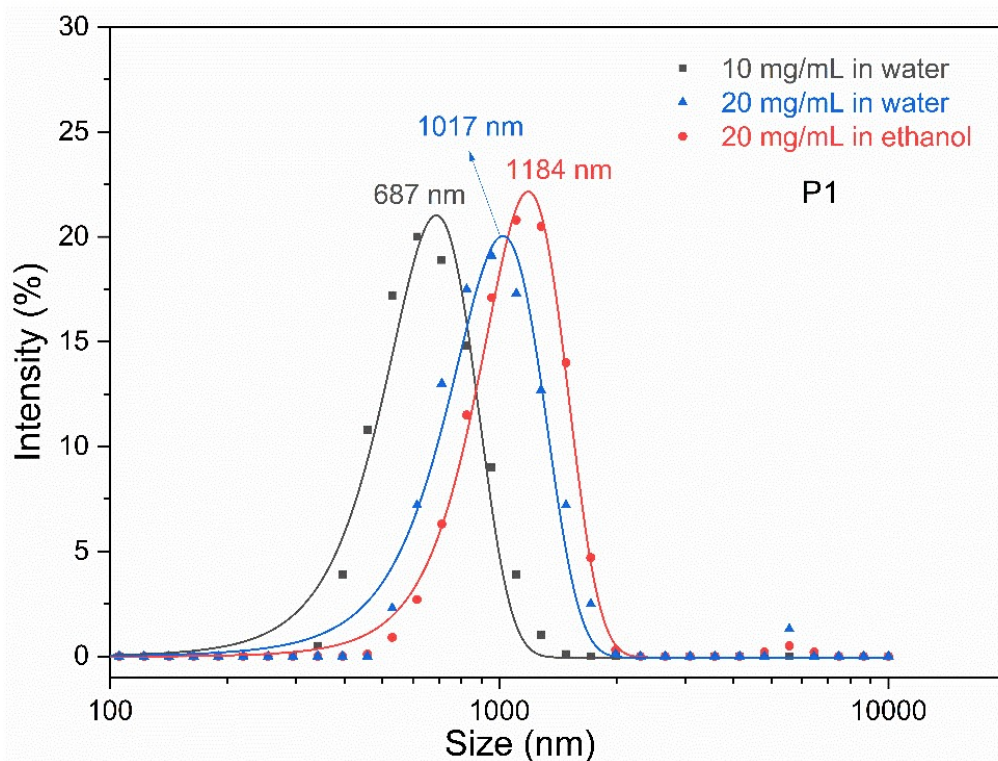

**Fig. S6** The aggregated size of P1 in different solvents

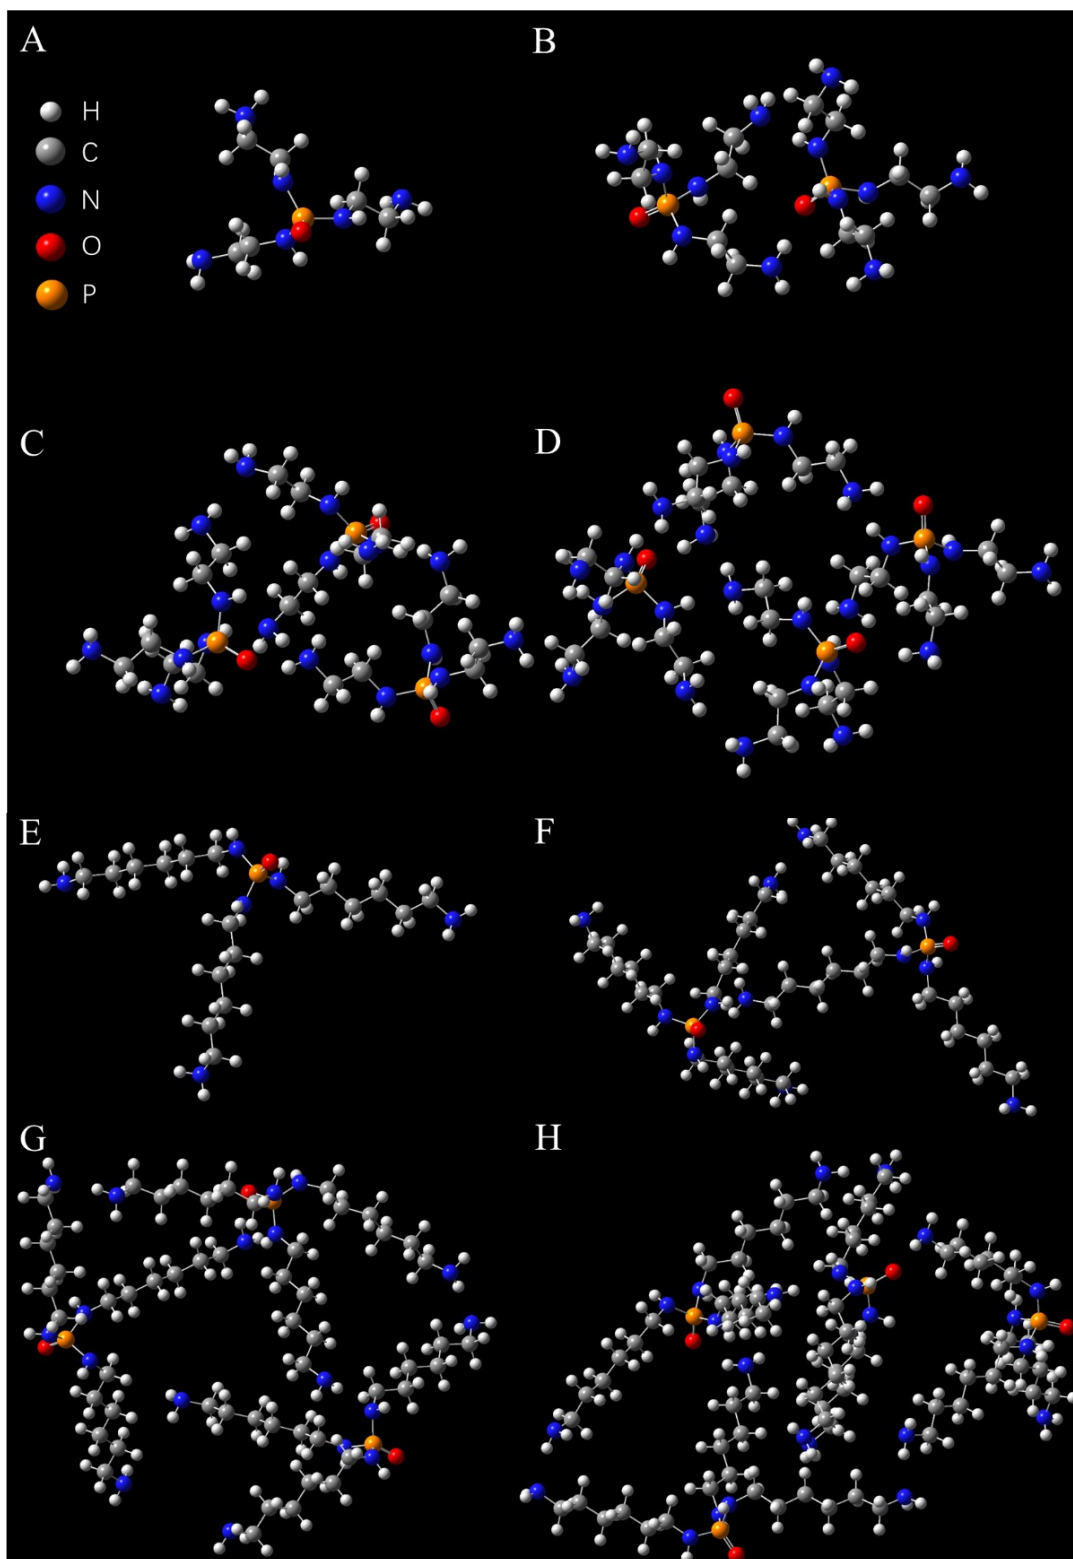

**Fig. S7** Optimized conformations of the first generation P1 with molecules increase from 1 to 4 (A~D) and P4 molecules increase from 1 to 4 (E~H)

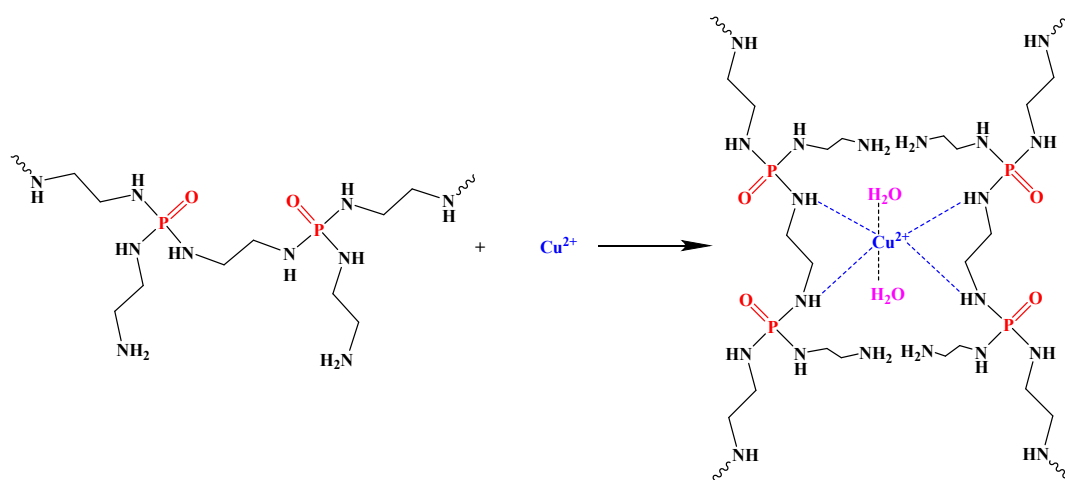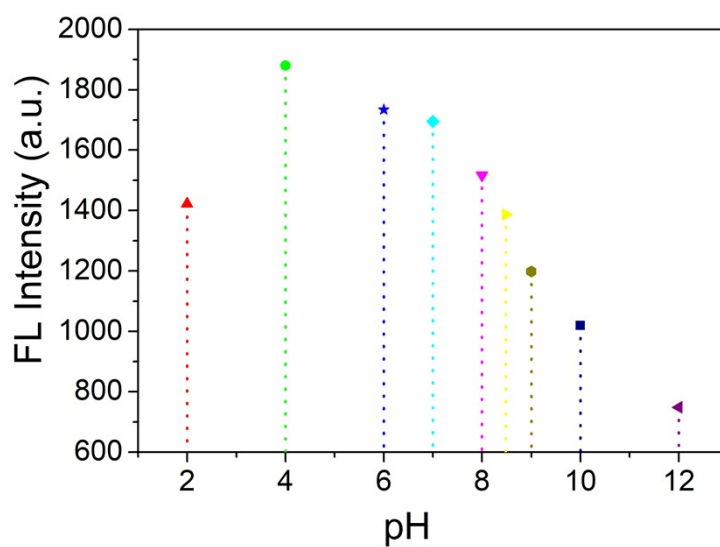

**Scheme S2.** The mechanism of copper ion discoloration by PPA

**Fig. S8.** The emission spectra of P1 in water solution (5 mg/mL) at different pH

**Fig.S9** Fluorescence intensity of P1 aqueous solution (20 mg/mL) with/without the copper ions (5 mmol/L)

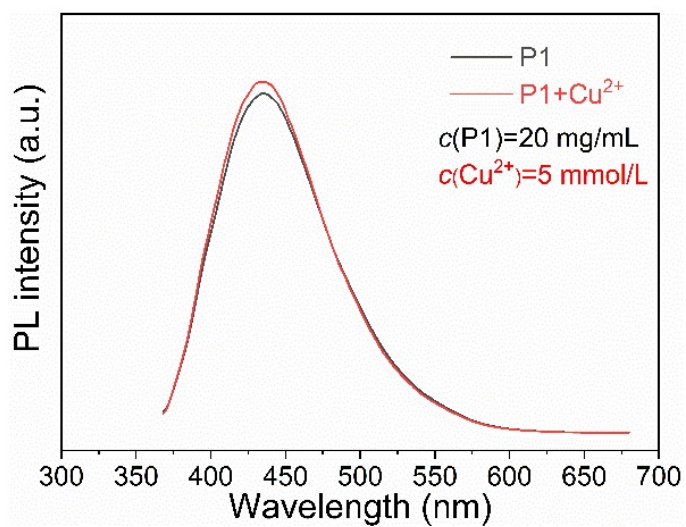

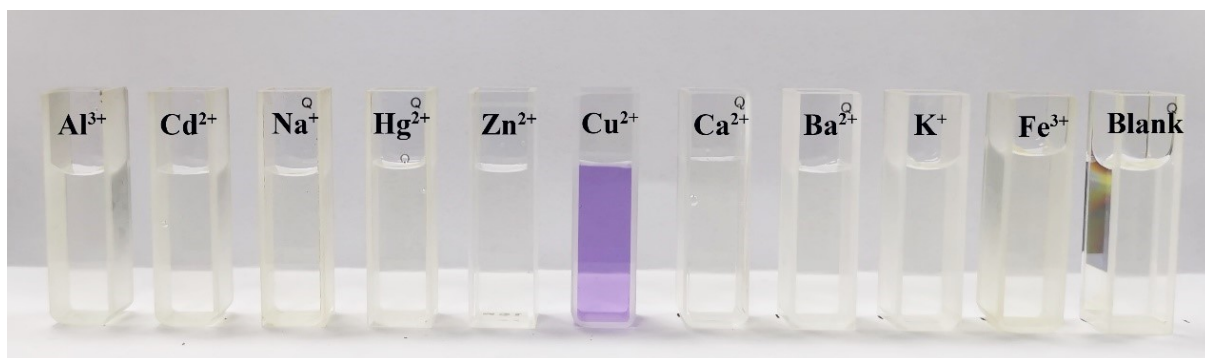

**Fig.S10** Color change of P1 aqueous solution (10 mg/mL) with different metal ions (5 mmol/L)

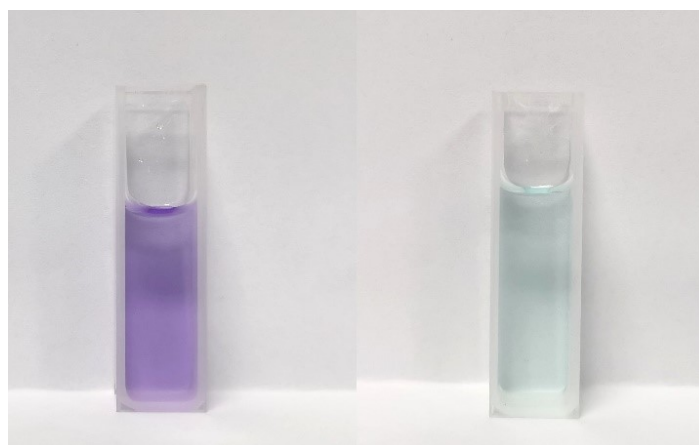

**Fig. S11** The color change of PPA-Cu<sup>2+</sup> solution by adding equivalent EDTA-2Na

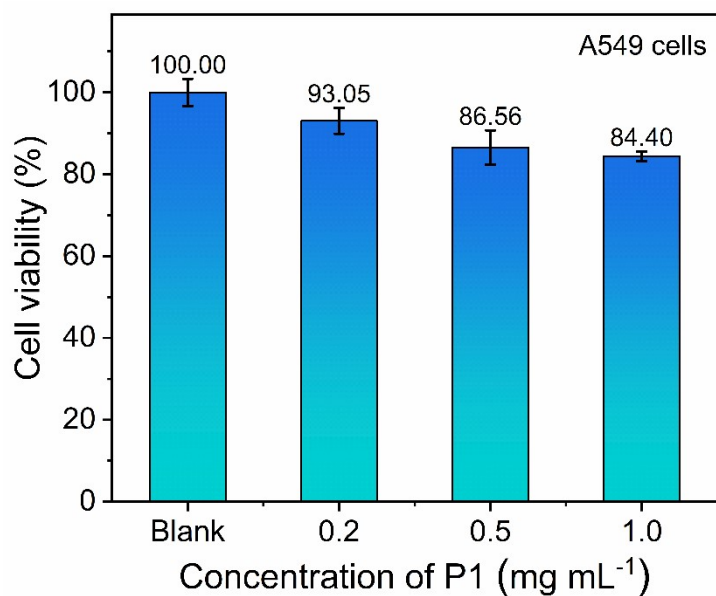

**Fig. S12** The cell biocompatibility assays of PPA at different concentrations (0.2, 0.5 and 1.0 mg mL<sup>-1</sup>)

**References:**



- 1 D. Tomalia, B. Klajnert-Maculewicz, K. Johnson, H. Brinkman, A. Janaszewska, D. Hedstrand, *Prog. Polym. Sci.*, 2019, **90**, 35-117.
- 2 Y. Feng, T. Bai, H. Yan, F. Ding, L. Bai, W. Feng, *Macromolecules*, 2019, **52**, 3075-3082.
- 3 L. Bai, H. Yan, Y. Feng, W. Feng, L Yuan, *Chem. Eng. J.*, 2019, **373**, 963-972.
